# Supplementary material
Source: PubMed Central journal article supplement (PMC3059330)
Supplement: NIHMS270345-supplement-1_si_001.pdf [file NIHMS270345-supplement-1_si_001.pdf]

# **Mechanistic Studies of 1-Aminocyclopropane-1-carboxylate Deaminase (ACCD): Characterization of an Unusual PLP-dependent Reaction**

Christopher J. Thibodeaux and Hung-wen Liu\*

Department of Pharmacy, Department of Chemistry and Biochemistry, and Institute for Cellular and Molecular Biology, University of Texas, Austin, TX, 78712

## **Supporting Information**

### **Methods**

**Description of reaction mixtures for  $^{13}\text{C}$ -KIE studies and purification of residual ACC:** Large scale reactions (performed in duplicate) were conducted by dissolving ~ 950 mg of ACC to a final concentration of 50 mM in 100 mM potassium phosphate (pH 7.5). To initiate the reaction, wt ACCD enzyme was added and the reaction mixture was slowly stirred at 25 °C. The progress of the reaction was periodically assessed using the coupled LDH assay to determine the concentration of reaction product,  $\alpha$ -KB. The enzyme activity decreased over ~ 24 h, so aliquots of fresh enzyme were periodically added as turnover became sluggish. As the reaction neared completion, a 0.5 mL aliquot was removed for determining the fraction of reaction and the remainder of the reaction mixture was cooled to 4 °C and filtered using a YM-10 membrane (Millipore, Billerica, MA.) to remove the enzyme. The filtered sample was loaded onto Dowex-50 cation exchange resin (100 mL) to recover the residual ACC starting material. The resin had been previously equilibrated with 250 mL of 2 M HCl and washed with H<sub>2</sub>O (~ 300 mL) until the pH of the column eluate was neutral. After loading the reaction onto the

column, the resin was washed with an additional 500 mL of H<sub>2</sub>O to elute the reaction product ( $\alpha$ -KB) and phosphate buffer. ACC was then eluted with 300 mL of 6% NH<sub>4</sub>OH in H<sub>2</sub>O (pH 11.5) and the solvent was removed by rotary evaporation and lyophilization. The column eluate was repeatedly dissolved in ~250 mL H<sub>2</sub>O and lyophilized to remove the majority of the NH<sub>3</sub>. For each large scale reaction, a separate commercial batch of ACC was used. A 50 mg sample of ACC was saved from each commercial batch for determination of the <sup>13</sup>C content of unreacted starting material. The sample was dissolved in 200 mL (the approximate volume of the large-scale reactions) of 100 mM potassium phosphate (pH 7.5) and was purified by cation exchange chromatography in a manner identical to that described for the recovery of residual ACC from the large scale reactions.

**Measuring <sup>13</sup>C-enrichment ( $R/R_0$ ) in ACC using <sup>13</sup>C-NMR spectroscopy:**

Following purification, the unreacted and residual ACC samples were dissolved separately in 660  $\mu$ L of an H<sub>2</sub>O:D<sub>2</sub>O mixture (90:10% v/v) and analyzed by <sup>13</sup>C-NMR spectroscopy to determine the relative <sup>13</sup>C enrichment at each carbon atom of ACC. NMR spectra were collected on a Varian Unity 500 MHz NMR spectrometer at the NMR core facility at the University of Texas, Austin. A total of ten <sup>13</sup>C-NMR spectra were recorded for each sample. Each spectrum was composed of 256 scans, separated by a delay time of 80 sec between scans to ensure full relaxation of each of the <sup>13</sup>C nuclei of ACC between individual instrument pulses. For integration of <sup>13</sup>C-NMR peaks, a zeroth order baseline correction was made in the vicinity of each signal, and the peak areas were determined by integrating a 10 Hz window centered around the chemical shift of each peak. The same integration parameters were then applied to each of the nine other

spectra in that particular set. The relative  $^{13}\text{C}$  enrichment of the carboxylate carbon of ACC was used as an internal standard to normalize the relative  $^{13}\text{C}$  enrichment of  $\text{C}_\alpha$  and  $\text{C}_\beta$  within each sample. This relative measurement of the  $^{13}\text{C}$  content of  $\text{C}_\alpha$  and  $\text{C}_\beta$  is hereafter referred to as  $R$  for residual ACC samples recovered from large scale wt ACCD reactions, or as  $R_0$  for unreacted ACC samples. From the averaged values of  $R$  and  $R_0$  determined from the ten NMR spectra, the ratio  $R/R_0$  and its associated standard error  $\Delta(R/R_0)$  was calculated for the  $\text{C}_\alpha$  and  $\text{C}_\beta$  atoms. It should be emphasized that for each large-scale reaction, the  $R$  and  $R_0$  measurements are derived from the same commercial batch of substrate.

**Determining the fraction of reaction ( $F$ ):** To determine the fraction of reaction ( $F$ ), the concentration of  $\alpha$ -KB present in the quenched reaction mixture at the end of the large scale reaction ( $\text{C}_1$ ) was compared to the concentration of  $\alpha$ -KB ( $\text{C}_2$ ) present in a sample of the same reaction mixture that had been allowed to reach 100% conversion by the addition of excess ACCD.  $\text{C}_1$  and  $\text{C}_2$  were measured via an end-point assay that coupled  $\alpha$ -KB reduction to NADH oxidation using lactate dehydrogenase (LDH). A 1 mL solution containing 150  $\mu\text{M}$  NADH, 4 units of LDH, and 100 mM sodium phosphate buffer (pH 7.0) was transferred to a cuvette and the absorbance at 340 nm was recorded over several minutes. A 1  $\mu\text{L}$  aliquot of the large scale reaction mixture (or of the reaction driven to 100% completion) was then added and the change in absorbance at 340 nm was allowed to reach its equilibrium level. The change in absorbance at 340 nm ( $\epsilon_{340}$  of NADH =  $6220 \text{ M}^{-1}\text{cm}^{-1}$ ) was used to calculate the concentration of  $\alpha$ -KB. A total of 10 replicate measurements of both  $\text{C}_1$  and  $\text{C}_2$  was made for each large scale reaction.

The fraction of reaction was then calculated as  $F = C_1/C_2$ , and the standard errors of the  $C_1$  and  $C_2$  measurements were propagated to calculate  $\Delta F$ .

**Calculation of  $^{13}(k_{\text{cat}}/K_m)$  and its associated standard error:** From the  $R/R_O$  and  $F$  values determined above, the  $^{13}(k_{\text{cat}}/K_m)$  at both  $C_\alpha$  and  $C_\beta$  of ACC ( $\text{KIE}_{\text{calc}}$ ) were calculated with eq S.1. The standard errors on  $\text{KIE}_{\text{calc}}$  that result from uncertainties in the fraction of reaction ( $\Delta\text{KIE}_F$ ) and  $^{13}\text{C}$  enrichment ( $\Delta\text{KIE}_R$ ) measurements were then calculated with eq S.2 and S.3, respectively, using the experimentally determined standard errors on  $R/R_O$  and  $F$  ( $\Delta R/R_O$  and  $\Delta F$ , respectively).<sup>1</sup> The standard error on  $\text{KIE}_{\text{calc}}$  was then calculated with Eq S.4 and is reported in the main text.

Eq S.1:

$$\text{KIE}_{\text{calc}} = \ln(1-F)/\ln[(1-F)R/R_O]$$

Eq S.2:

$$\Delta\text{KIE}_F = -\ln(R/R_O) \Delta F / [(1-F)\ln^2[(1-F)R/R_O]]$$

Eq S.3:

$$\Delta\text{KIE}_R = -\ln(1-F) \Delta (R/R_O) / [(R/R_O)\ln^2[(1-F)R/R_O]]$$

Eq S.4:

$$\Delta\text{KIE}_{\text{calc}} = \text{KIE}_{\text{calc}} [(\Delta\text{KIE}_F/\text{KIE}_{\text{calc}})^2 + (\Delta\text{KIE}_R/\text{KIE}_{\text{calc}})^2]^{1/2}$$

## Results

| wt ACCD (H <sub>2</sub> O) |                                     |                     | wt ACCD (D <sub>2</sub> O) |                                     |                     |
|----------------------------|-------------------------------------|---------------------|----------------------------|-------------------------------------|---------------------|
| pH                         | $k_{\text{cat}}$ (s <sup>-1</sup> ) | $K_{\text{m}}$ (mM) | pD                         | $k_{\text{cat}}$ (s <sup>-1</sup> ) | $K_{\text{m}}$ (mM) |
| 6.55                       | 1.62(6)                             | 21(2)               | 7.13                       | 0.32(1)                             | 23(2)               |
| 6.65                       | 1.82(3)                             | 18(2)               | 7.45                       | 0.26(1)                             | 5.4(6)              |
| 6.83                       | 1.61(3)                             | 6.7(4)              | 7.94                       | 0.25(1)                             | 1.7(2)              |
| 7.14                       | 1.69(2)                             | 3.0(1)              | 8.23                       | 0.21(1)                             | 0.7(1)              |
| 7.41                       | 1.48(2)                             | 2.2(1)              | 8.48                       | 0.226(4)                            | 0.46(4)             |
| 7.69                       | 1.32(2)                             | 1.2(1)              | 8.81                       | 0.21(1)                             | 0.46(1)             |
| 7.95                       | 1.35(2)                             | 0.96(7)             | 9.09                       | 0.212(5)                            | 0.37(5)             |
| 8.00                       | 1.38(2)                             | 1.2(1)              | 9.41                       | 0.203(4)                            | 0.73(8)             |
| 8.21                       | 1.29(3)                             | 0.85(9)             | 9.73                       | 0.17(1)                             | 1.4(4)              |
| 8.49                       | 1.11(5)                             | 1.2(2)              |                            |                                     |                     |
| 8.82                       | 1.02(3)                             | 2.3(4)              |                            |                                     |                     |
| 9.12                       | 0.94(4)                             | 6.2(9)              |                            |                                     |                     |
| 9.41                       | 0.97(6)                             | 10(2)               |                            |                                     |                     |
| 9.71                       | 0.83(3)                             | 13(1)               |                            |                                     |                     |

  

| E295D |                                     |                     | Y268F |                                     |                     |
|-------|-------------------------------------|---------------------|-------|-------------------------------------|---------------------|
| pH    | $k_{\text{cat}}$ (s <sup>-1</sup> ) | $K_{\text{m}}$ (mM) | pH    | $k_{\text{cat}}$ (s <sup>-1</sup> ) | $K_{\text{m}}$ (mM) |
| 6.72  | 0.103(6)                            | 27(4)               | 7.00  | 0.0078(3)                           | 7.0(5)              |
| 7.02  | 0.134(3)                            | 13(1)               | 7.22  | 0.0059(1)                           | 5.1(5)              |
| 7.27  | 0.138(3)                            | 7.1(5)              | 7.33  | 0.0040(1)                           | 5.1(3)              |
| 7.50  | 0.139(3)                            | 5.0(4)              | 7.5   | 0.0040(1)                           | 4.2(4)              |
| 7.62  | 0.147(2)                            | 3.6(2)              | 7.77  | 0.0120(2)                           | 4.1(3)              |
| 7.88  | 0.147(3)                            | 2.4(2)              | 8.12  | 0.0186(3)                           | 4.0(2)              |
| 8.21  | 0.126(2)                            | 1.7(1)              | 8.44  | 0.0261(4)                           | 3.4(2)              |
| 8.50  | 0.124(3)                            | 2.4(2)              | 9.00  | 0.0261(6)                           | 3.2(.3)             |
| 8.77  | 0.130(4)                            | 4.0(4)              | 9.30  | 0.026(1)                            | 4.9(6)              |
| 9.12  | 0.136(6)                            | 12(1)               | 9.57  | 0.029(1)                            | 10(1)               |
| 9.50  | 0.140(4)                            | 36(2)               |       |                                     |                     |

**Table S1.** Summary of fits of steady state kinetic data to the Michaelis-Menten Equation. Standard errors are shown in parentheses.

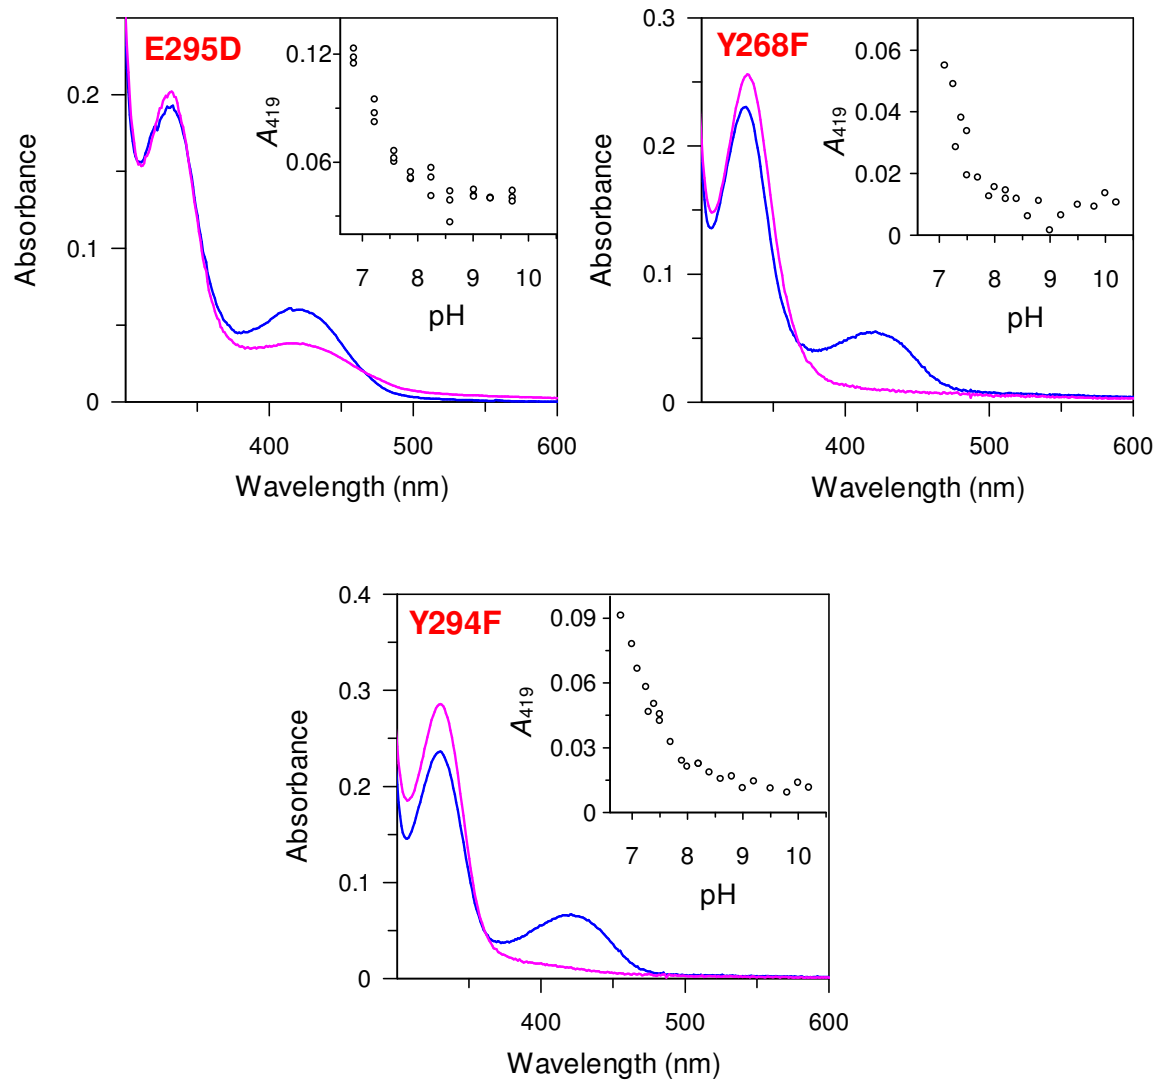

**Figure S1:** pH-Dependence of internal aldimine absorption for the E295D, Y268F, and Y294F mutant enzymes.

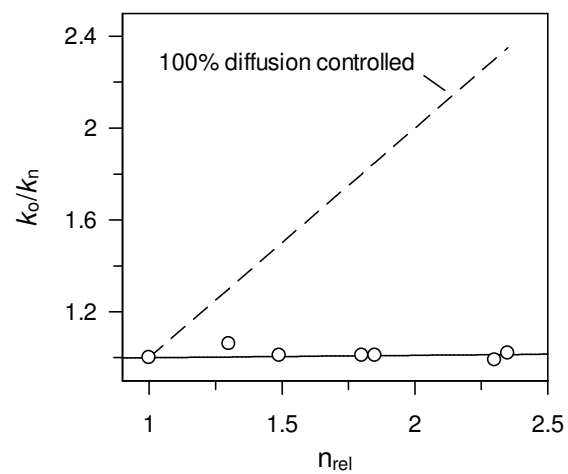

**Figure S2:** Viscosity effects on  $k_{cat}$  for wt ACCD. The data were fit with eq 4 as described in the Materials and Methods.

| <b>Model</b>          | <b><math>SSR_{(LOF)}</math></b> | <b><math>d_{f(LOF)}</math></b> | <b><math>F</math></b> | <b><math>F_c</math></b> |
|-----------------------|---------------------------------|--------------------------------|-----------------------|-------------------------|
| <b>T<sub>1</sub></b>  | 0.00124                         | 4                              | 1.20                  | 2.93                    |
| <b>T<sub>2</sub></b>  | 0.000327                        | 3                              | 0.42                  | 3.16                    |
| <b>T<sub>1S</sub></b> | 0.000204                        | 3                              | 0.26                  | 3.16                    |
|                       | <b><math>SSR_{(PE)}</math></b>  | <b><math>d_{f(PE)}</math></b>  |                       |                         |
| <b>Pure Error</b>     | 0.00463                         | 18                             |                       |                         |

**Table S2.** Lack-of-fit  $F$ -tests for fits of the proton inventory data to various forms of the Gross-Butler equation (see eq 5 in Materials and Methods). The definition of each model (T<sub>1</sub>, T<sub>2</sub>, and T<sub>1S</sub>) is shown in Table 2 of the main text. Lack-of-fit  $F$ -values were calculated as:  $F = (SSR_{(LOF)}/d_{f(LOF)})/(SSR_{(PE)}/d_{f(PE)})$  as described by Draper and Smith,<sup>2</sup> where  $SSR$  are sum square residuals and  $d_f$  are the degrees of freedom for the lack-of-fit (LOF) and pure error (PE) estimates.  $F_c$  is the critical  $F$ -value at the 5% significance level.



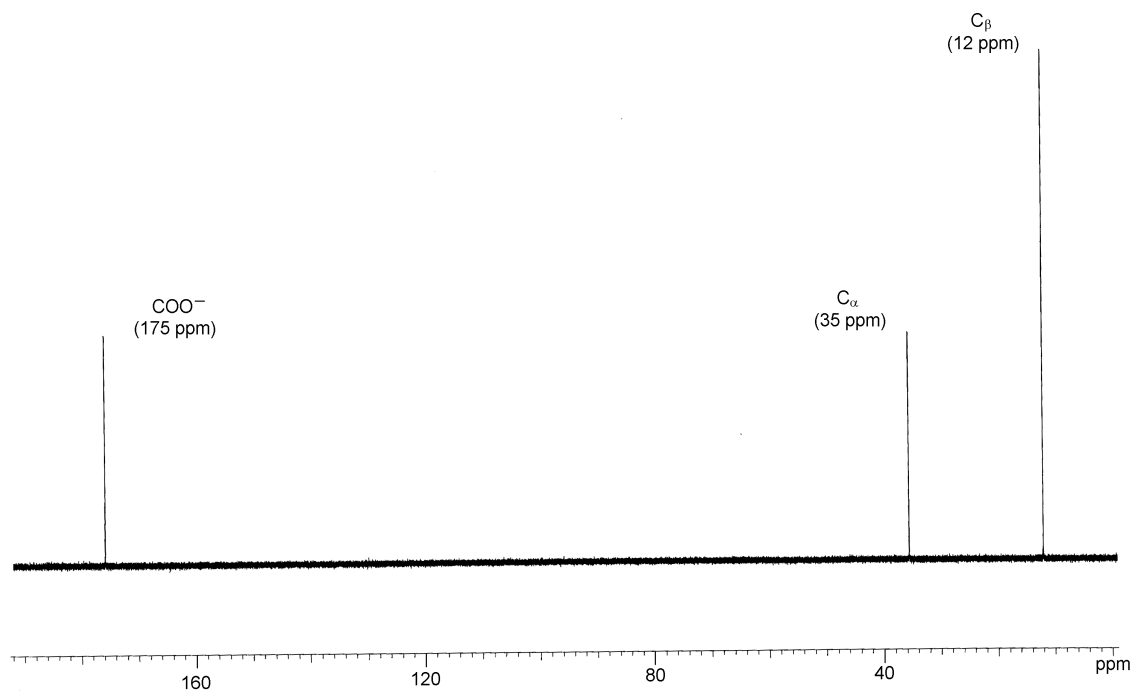

**Figure S3.** A typical  $^{13}\text{C}$ -NMR spectrum of ACC taken under the conditions employed in this study.

| Reaction 1                   |               |                |                |                                              |                                              |                  |                |                |                                             |                                             |
|------------------------------|---------------|----------------|----------------|----------------------------------------------|----------------------------------------------|------------------|----------------|----------------|---------------------------------------------|---------------------------------------------|
| N                            | Unreacted ACC |                |                |                                              |                                              | Residual ACC     |                |                |                                             |                                             |
|                              | COO-          | C <sub>α</sub> | C <sub>β</sub> | R <sub>o(Cα)</sub> =<br>C <sub>α</sub> /COO- | R <sub>o(Cβ)</sub> =<br>C <sub>β</sub> /COO- | COO-             | C <sub>α</sub> | C <sub>β</sub> | R <sub>(Cα)</sub> =<br>C <sub>α</sub> /COO- | R <sub>(Cβ)</sub> =<br>C <sub>β</sub> /COO- |
| 1                            | .75           | .746           | 1.32           | .994                                         | 1.76                                         | .804             | .809           | 1.4            | 1.01                                        | 1.74                                        |
| 2                            | .775          | .755           | 1.34           | .974                                         | 1.73                                         | .808             | .824           | 1.42           | 1.02                                        | 1.76                                        |
| 3                            | .77           | .756           | 1.31           | .982                                         | 1.70                                         | .81              | .832           | 1.43           | 1.03                                        | 1.77                                        |
| 4                            | .772          | .749           | 1.31           | .970                                         | 1.70                                         | .814             | .829           | 1.43           | 1.02                                        | 1.76                                        |
| 5                            | .735          | .748           | 1.3            | 1.02                                         | 1.77                                         | .839             | .846           | 1.45           | 1.01                                        | 1.73                                        |
| 6                            | .755          | .733           | 1.32           | .971                                         | 1.75                                         | .82              | .837           | 1.45           | 1.02                                        | 1.77                                        |
| 7                            | .75           | .741           | 1.3            | .988                                         | 1.73                                         | .823             | .829           | 1.46           | 1.01                                        | 1.77                                        |
| 8                            | .743          | .742           | 1.33           | .999                                         | 1.79                                         | .851             | .839           | 1.44           | 0.986                                       | 1.69                                        |
| 9                            | .749          | .737           | 1.3            | .984                                         | 1.74                                         | .814             | .846           | 1.45           | 1.04                                        | 1.78                                        |
| 10                           | .757          | .741           | 1.33           | .979                                         | 1.76                                         | .825             | .848           | 1.44           | 1.03                                        | 1.75                                        |
| <b>Average R<sub>o</sub></b> |               |                |                | 0.986(4)                                     | 1.74(1)                                      | <b>Average R</b> |                |                | 1.016(5)                                    | 1.75(1)                                     |

  

| Reaction 2                   |               |                |                |                                              |                                              |                  |                |                |                                             |                                             |
|------------------------------|---------------|----------------|----------------|----------------------------------------------|----------------------------------------------|------------------|----------------|----------------|---------------------------------------------|---------------------------------------------|
| N                            | Unreacted ACC |                |                |                                              |                                              | Residual ACC     |                |                |                                             |                                             |
|                              | COO-          | C <sub>α</sub> | C <sub>β</sub> | R <sub>o(Cα)</sub> =<br>C <sub>α</sub> /COO- | R <sub>o(Cβ)</sub> =<br>C <sub>β</sub> /COO- | COO-             | C <sub>α</sub> | C <sub>β</sub> | R <sub>(Cα)</sub> =<br>C <sub>α</sub> /COO- | R <sub>(Cβ)</sub> =<br>C <sub>β</sub> /COO- |
| 1                            | .979          | .937           | 1.62           | .957                                         | 1.655                                        | 1.2              | 1.17           | 2.03           | .975                                        | 1.692                                       |
| 2                            | .977          | .908           | 1.61           | .929                                         | 1.648                                        | 1.21             | 1.15           | 2.07           | .950                                        | 1.717                                       |
| 3                            | .976          | .926           | 1.62           | .949                                         | 1.66                                         | 1.21             | 1.19           | 2.06           | .983                                        | 1.702                                       |
| 4                            | .946          | .942           | 1.62           | .996                                         | 1.712                                        | 1.2              | 1.19           | 2.07           | .992                                        | 1.725                                       |
| 5                            | .97           | .906           | 1.61           | .934                                         | 1.66                                         | 1.21             | 1.21           | 2.1            | 1.00                                        | 1.736                                       |
| 6                            | 1.01          | .941           | 1.63           | .932                                         | 1.614                                        | 1.2              | 1.18           | 2.07           | .983                                        | 1.725                                       |
| 7                            | .99           | .954           | 1.65           | .964                                         | 1.667                                        | 1.23             | 1.16           | 2.1            | .943                                        | 1.707                                       |
| 8                            | .996          | .922           | 1.61           | .926                                         | 1.616                                        | 1.24             | 1.19           | 2.07           | .960                                        | 1.669                                       |
| 9                            | .984          | .926           | 1.62           | .941                                         | 1.646                                        | 1.2              | 1.18           | 2.06           | .983                                        | 1.717                                       |
| 10                           | .999          | .948           | 1.64           | .949                                         | 1.642                                        | 1.22             | 1.21           | 2.09           | .992                                        | 1.713                                       |
| <b>Average R<sub>o</sub></b> |               |                |                | .948(7)                                      | 1.652(6)                                     | <b>Average R</b> |                |                | .976(6)                                     | 1.710(6)                                    |

**Table S3.** Summary of raw <sup>13</sup>C-NMR integrations and calculation of average *R* and *R<sub>o</sub>* values for the C<sub>α</sub> and C<sub>β</sub> atoms in the two replicate reactions. *N* is the spectrum number. The values in parentheses on the average *R* and *R<sub>o</sub>* parameters are the standard errors in the final digit.

| Replicate                       | Reaction 1           |                | Reaction 2           |                |
|---------------------------------|----------------------|----------------|----------------------|----------------|
|                                 | C <sub>1</sub>       | C <sub>2</sub> | C <sub>1</sub>       | C <sub>2</sub> |
| 1                               | 45.19                | 50.92          | 42.54                | 50.48          |
| 2                               | 45.14                | 51.71          | 42.32                | 51.39          |
| 3                               | 44.99                | 50.83          | 42.46                | 51.74          |
| 4                               | 47.14                | 50.37          | 42.89                | 52.39          |
| 5                               | 45.60                | 51.19          | 43.34                | 52.43          |
| 6                               | 46.01                | 50.97          | 44.06                | 50.68          |
| 7                               | 45.95                | 50.07          | 43.40                | 52.66          |
| 8                               | 46.99                | 50.59          | 44.53                | 52.79          |
| 9                               | 47.61                | 51.28          | 43.48                | 51.41          |
| 10                              | 46.52                | 50.80          | 42.34                | 51.33          |
| Average                         | 46.1 ± 0.29          | 50.9 ± 0.14    | 43.1 ± 0.24          | 51.7 ± 0.26    |
| <b><math>F = C_1/C_2</math></b> | <b>0.906 ± 0.006</b> |                | <b>0.834 ± 0.006</b> |                |

**Table S4.** Fraction of reaction measurement. The coupled LDH enzyme assay was used to quantify the concentration of  $\alpha$ -KB at the end of the each large-scale reaction (C<sub>1</sub>) as well as the concentration of  $\alpha$ -KB when the reaction was taken to 100% completion by the addition of excess ACCD (C<sub>2</sub>). The fraction of reaction,  $F$ , and its standard error ( $\Delta F$ ) were then calculated from the averaged values of C<sub>1</sub> and C<sub>2</sub>.

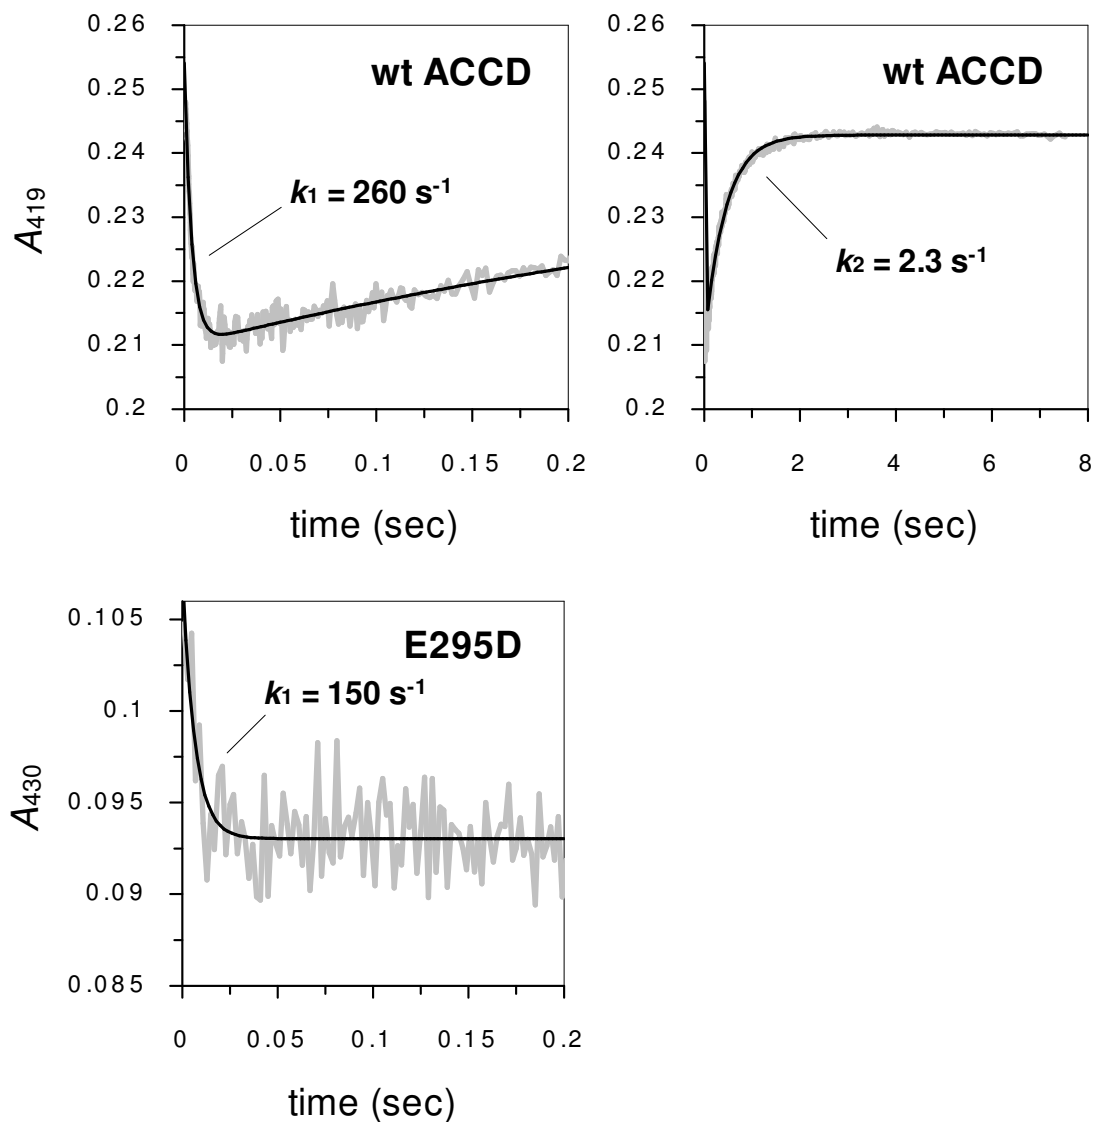

**Figure S4.** Fits of pre-steady state absorbance changes of wt ACCD and its mutants to exponential equations. The wt ACCD data (followed at 419 nm) were fit with a double exponential equation. The E295D data (followed at 430 nm) were fit with a single exponential equation, and the Y268F and Y294F data (followed at 430 nm) were fit with a triple exponential equation. Fitted parameter values are summarized in Table S4.

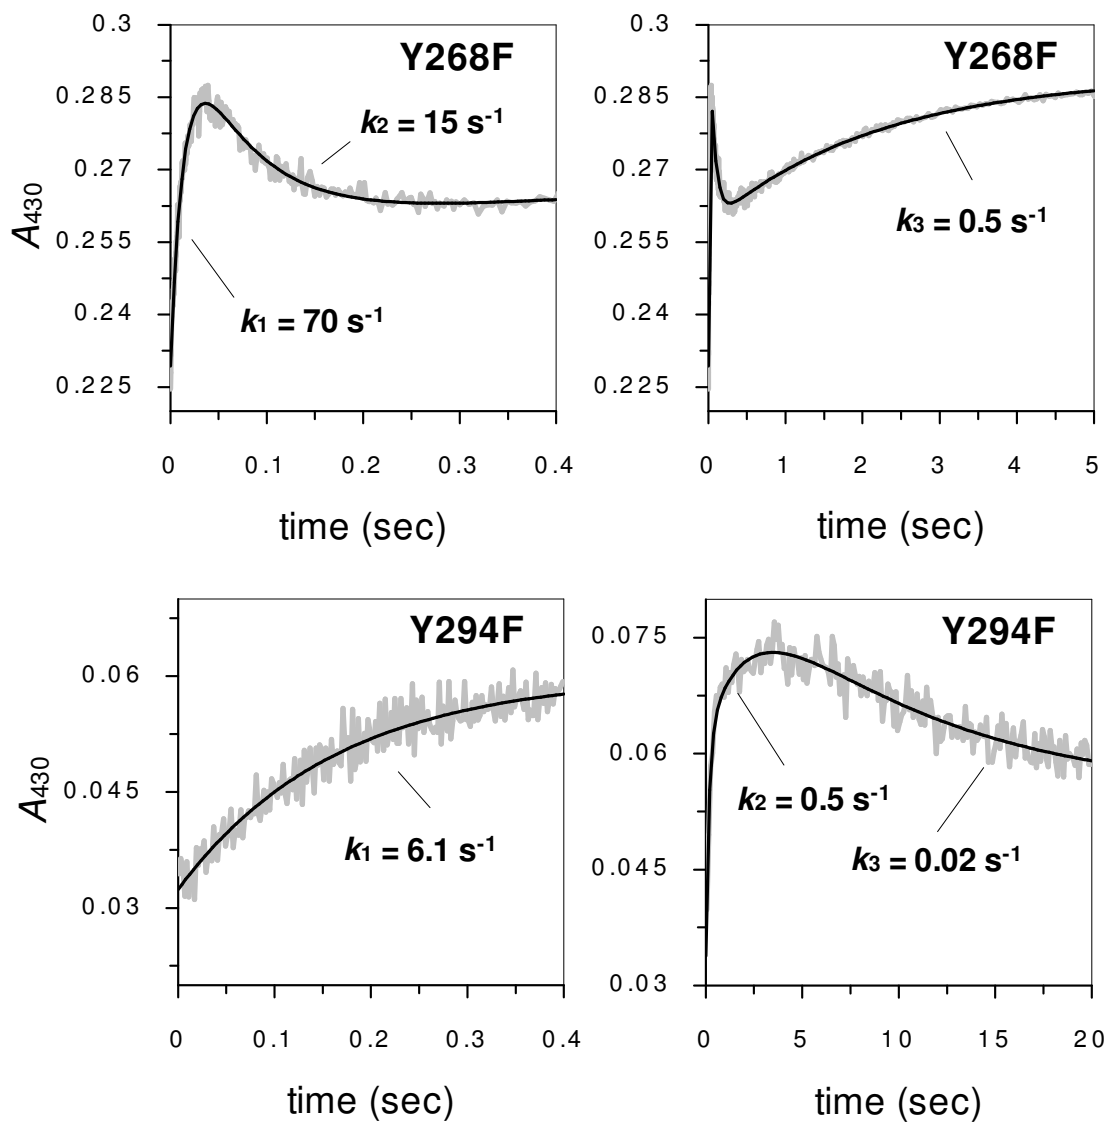

**Figure S4** (continued).

| <b>Enzyme</b> | <b><math>A_1</math></b> | <b><math>k_1</math></b> | <b><math>A_2</math></b> | <b><math>k_2</math></b> | <b><math>A_3</math></b> | <b><math>k_3</math></b> | <b><math>C</math></b> |
|---------------|-------------------------|-------------------------|-------------------------|-------------------------|-------------------------|-------------------------|-----------------------|
| wt ACCD       | -0.044(1)               | 260(5)                  | 0.033(1)                | 2.31(3)                 | -                       | -                       | 0.254(1)              |
| E295D         | -0.015(2)               | 150(30)                 | -                       | -                       | -                       | -                       | 0.108(2)              |
| Y268F         | 0.082(2)                | 71(2)                   | -0.053(2)               | 14.8(4)                 | 0.0310(2)               | 0.46(1)                 | 0.229(1)              |
| Y249F         | 0.028(1)                | 6.1(5)                  | 0.026(3)                | 0.48(7)                 | -0.033(2)               | 0.10(2)                 | 0.034(1)              |

**Table S5.** Summary of fitted parameter values obtained from non-linear fits of the stopped-flow data in Figure S4 to exponential equations. Standard errors in the final digit of the parameter estimates are shown in parentheses.

1. Singleton, D. A.; Thomas, A. A., High-precision simultaneous determination of multiple small kinetic isotope effects at natural abundance. *J. Am. Chem. Soc.* **1995**, 117, 9357-9358.
2. Draper, N. R.; Smith, H., *Applied Refression Analysis*. 3rd ed.; John Wiley & sons: New York, 1998; p 706.
